# Supplementary material for: Sarcopenia’s Prognostic Impact on Patients Treated with Immune Checkpoint Inhibitors: A Systematic Review and Meta-Analysis
Source: MDPI journal article supplement (doi:10.3390/jcm10225329), 2021-11-16
Supplement: s1 [file s1]

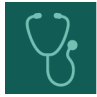

Supplementary File

# Sarcopenia's prognostic impact on patients treated with immune checkpoint inhibitors: a systematic review and meta-analysis

A

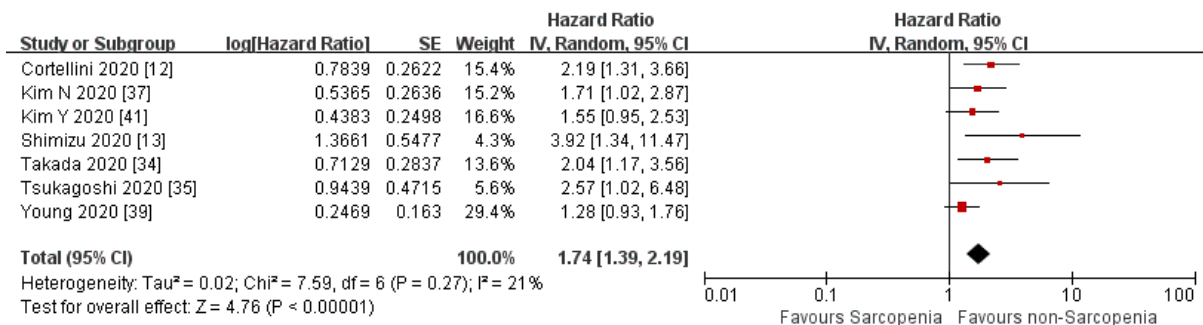

B

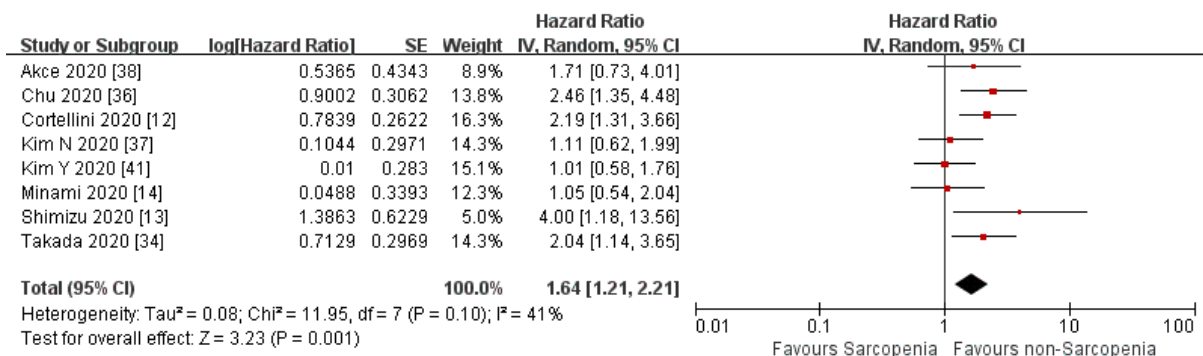

**Supplementary Figure S1.** Forest plots of hazard ratios of overall survival according to the sarcopenia excluding Magri et al. study —(A) overall survival in the univariate analysis, (B) overall survival with adjusted HRs.

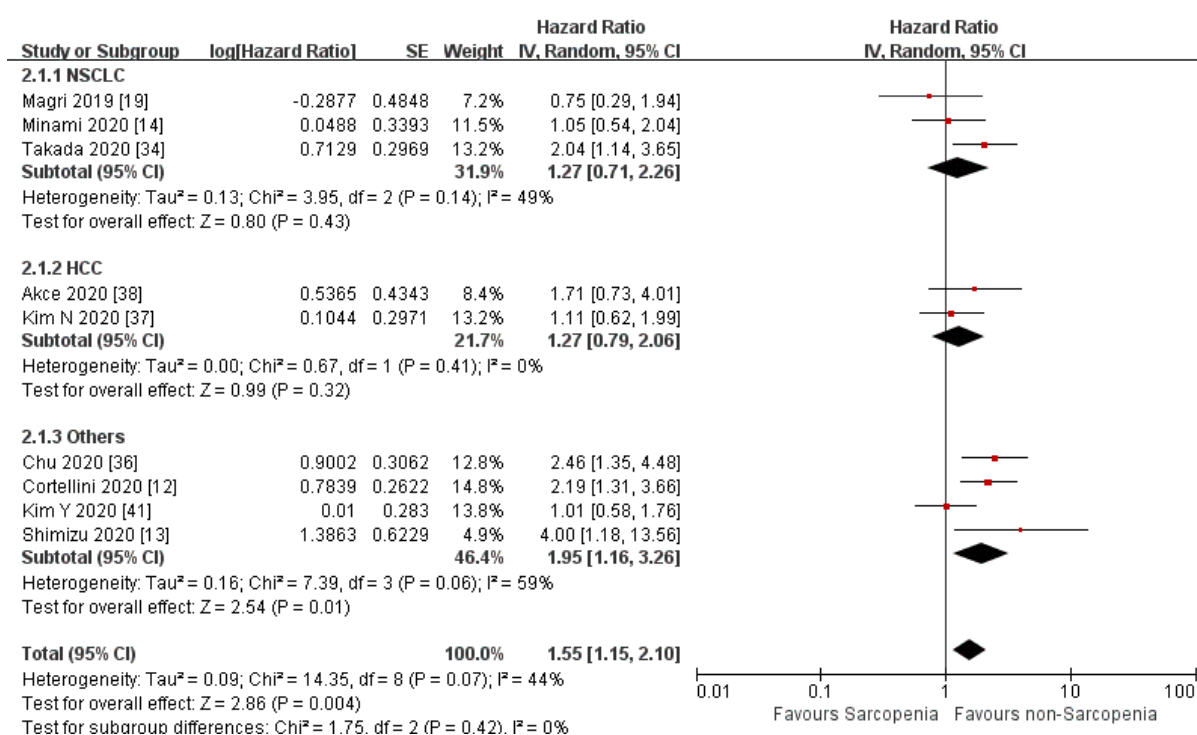

**Supplementary Figure S2.** Forest plots of hazard ratios for overall survival with adjusted HRs by cancer type.

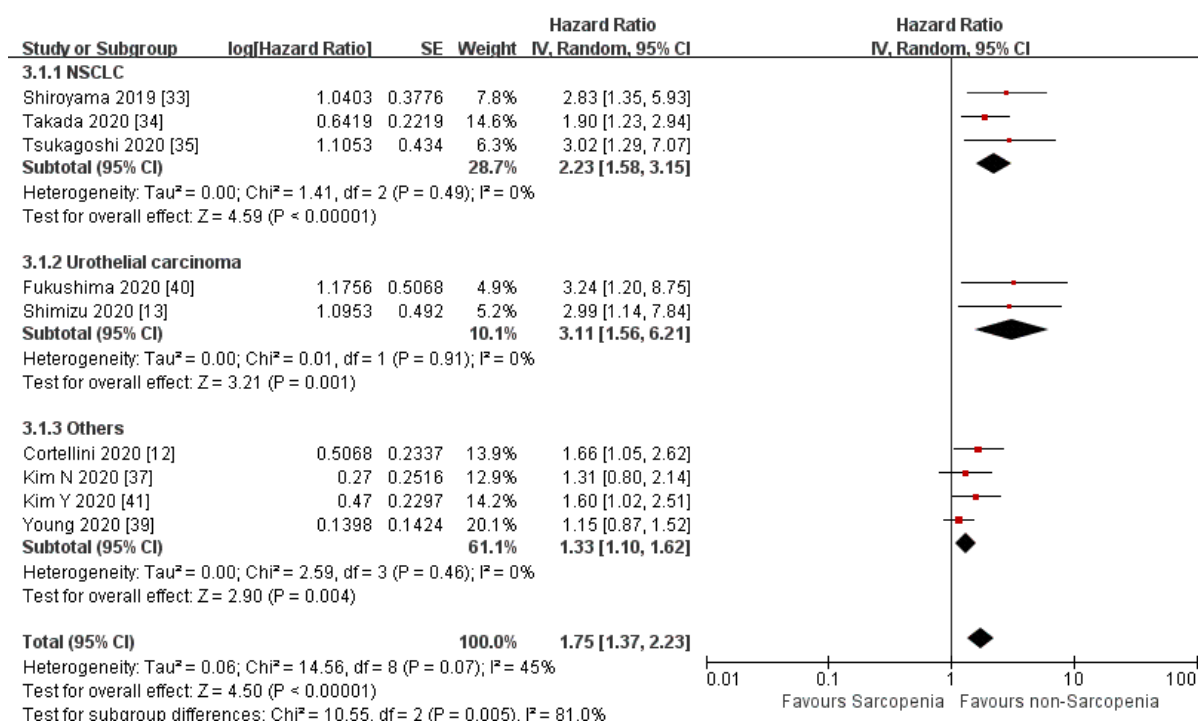

**Supplementary Figure S3.** Forest plots of hazard ratios for progression-free survival in the univariate analysis by cancer type.

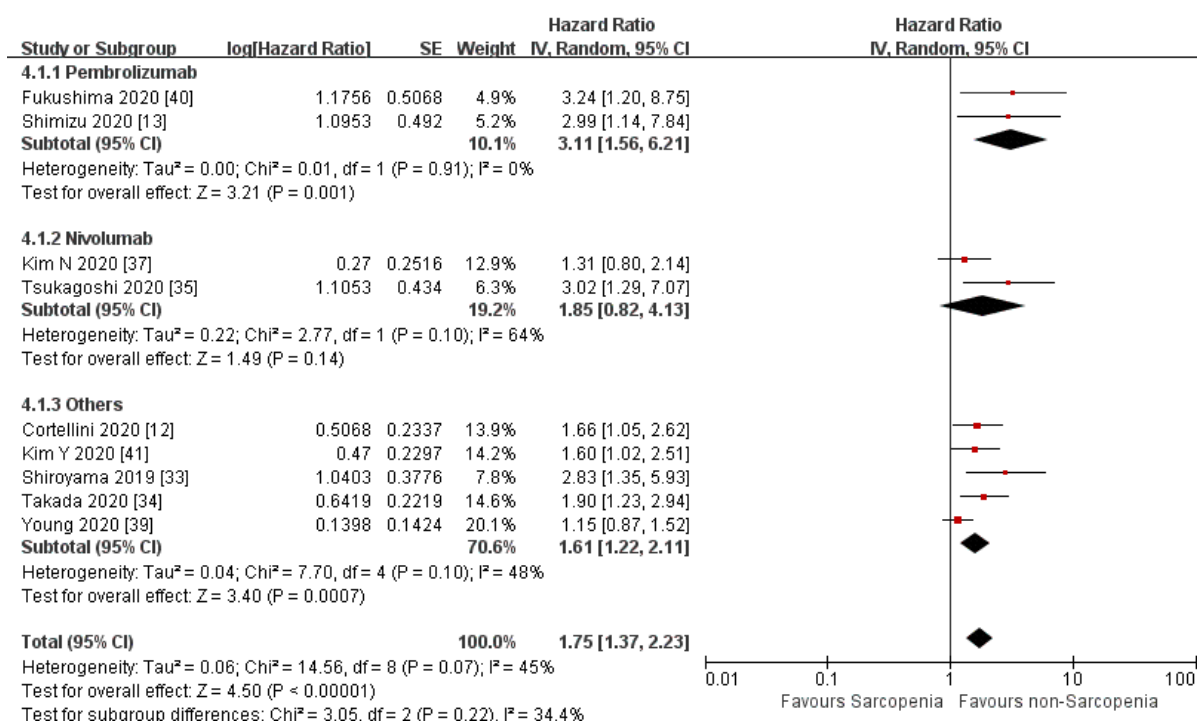

**Supplementary Figure S4.** Forest plots of hazard ratios for progression-free survival in the univariate analysis according to the type of immune checkpoint inhibitors

A

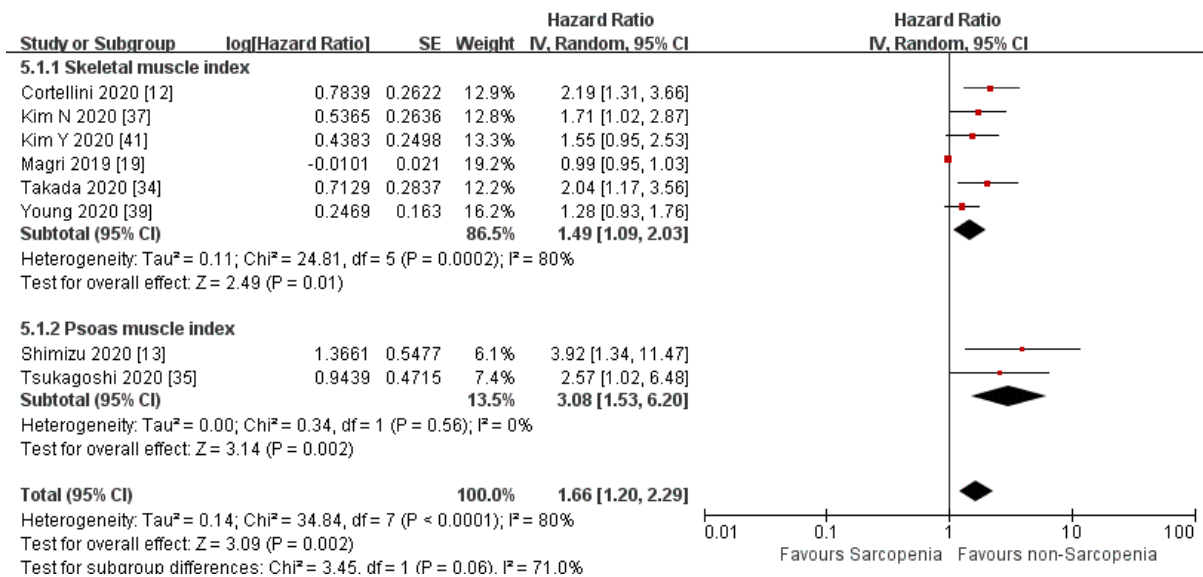

B

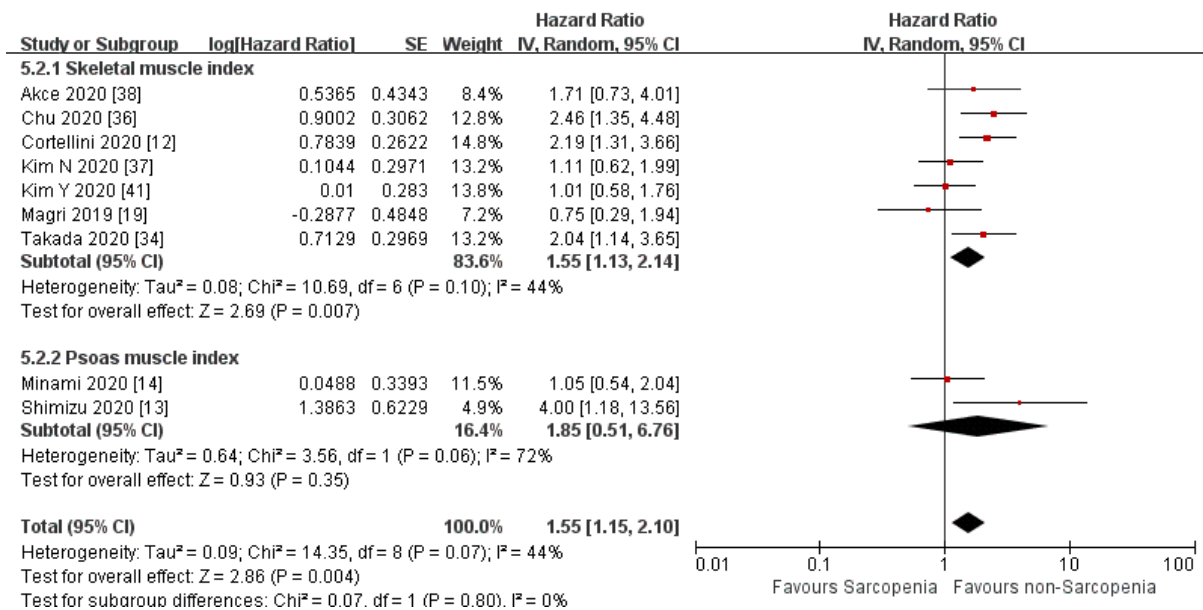

**Supplementary Figure S5.** Forest plots of hazard ratios for overall survival by skeletal muscle index and psoas muscle index—(A) overall survival in the univariate analysis, (B) overall survival with adjusted HRs.

A

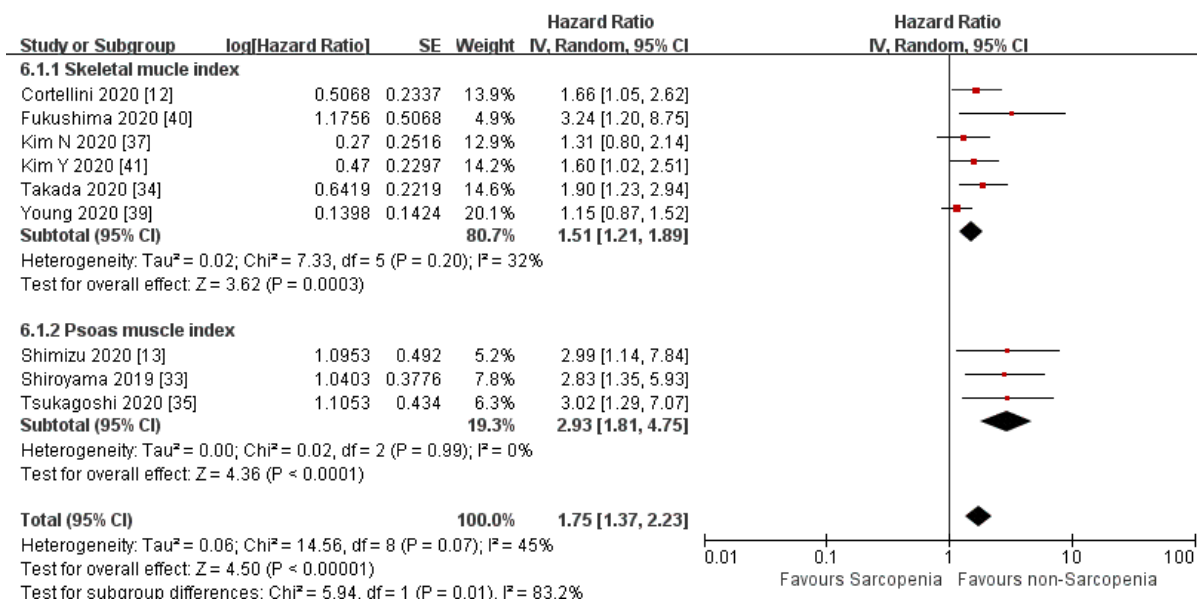

B

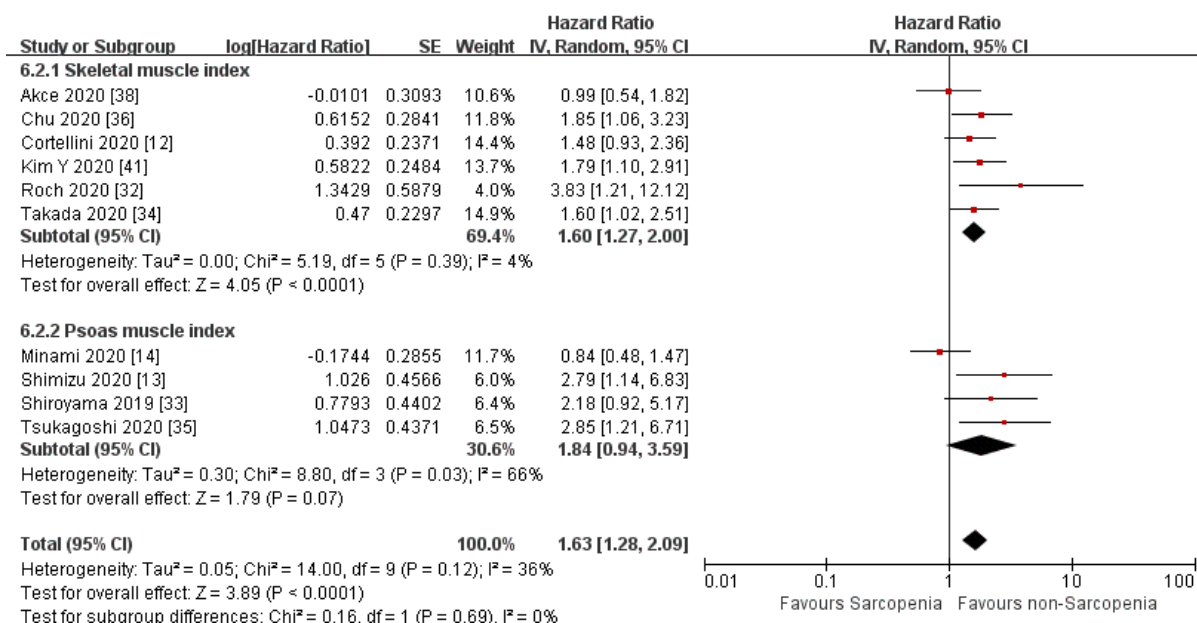

**Supplementary Figure S6.** Forest plots of hazard ratios for progression-free survival by skeletal muscle index and psoas muscle index—(A) progression-free survival in the univariate analysis, (B) progression-free survival with adjusted HRs.

Supplementary Table S1. Search strategy.

| Category 1                             | Category 2                              | Category 3                  | Category 4                         | Category 5                                  |
|----------------------------------------|-----------------------------------------|-----------------------------|------------------------------------|---------------------------------------------|
| muscle                                 | immunotherapy*                          | cancer                      | human                              | computed tomography                         |
| myosteatosis                           | PD1                                     | tumor (tumo?r)              | survival                           | CT                                          |
| radiodensity                           | PD-1                                    | malignancy (ma-lignan*)     | prognosis (prognos*)               | MRI                                         |
| skeletal muscle radiation at-tenuation | PD-L1                                   | neoplasm (neoplas*)         | complications (complicat*)         | dual-energy X-ray absorption                |
| cachexia (cache*)                      | PDL1                                    | carcinoma (carci*)          | cox                                | dual-energy X-ray absorptiometry            |
| sarcopenia (sarcopen*)                 | PDCD1                                   | malignant neoplasm (Emtree) | hazard ratio                       | DEXA                                        |
| muscle depletion (muscle*)             | CD274                                   | neoplasm (Emtree)           | prospective                        | DXA                                         |
| muscle loss (muscle*)                  | programmed cell death                   | neoplasms (MeSH)            | clinical trial                     | bioelectrical impedance analysis            |
| muscle wasting (muscle*)               | programmed death ligand                 |                             | observational                      | BIA                                         |
| muscle reduction (muscle*)             | nivolumab                               |                             | retrospective                      | computed tomography scanner (Emtree)        |
| muscle strength (muscle*)              | pembrolizumab                           |                             | survival (Emtree)                  | computer assisted tomography (Emtree)       |
| muscle mass (muscle*)                  | atezolizumab                            |                             | survival rate (Emtree)             | dual energy X ray absorptiometry (Emtree)   |
| reduced muscle (muscle*)               | avelumab                                |                             | survival time (Emtree)             | nuclear magnetic resonance imaging (Emtree) |
| depleted muscle (muscle*)              | durvalumab                              |                             | event free survival (Emtree)       | spiral computed tomography (MeSH)           |
| skeletal muscle (muscle*)              | cemiplimab                              |                             | long term survival (Emtree)        | magnetic resonance imaging (MeSH)           |
| muscle attenuation (muscle*)           | immune checkpoint*                      |                             | overall survival (Emtree)          |                                             |
| loss of muscle (muscle*)               | checkpoint blockade*                    |                             | disease free survival (Emtree)     |                                             |
| loss of skeletal muscle (muscle*)      | "Immunotherapy"[Mesh]                   |                             | cancer survival (Emtree)           |                                             |
| cachexia (Emtree)                      | "Nivolumab"[Mesh]                       |                             | median survival time (Emtree)      |                                             |
| malnutrition (Emtree)                  | "pembrolizumab" [Supplementary Concept] |                             | survival prediction (Emtree)       |                                             |
| skeletal muscle (Emtree)               | "atezolizumab" [Supplementary Concept]  |                             | recurrence free survival (Emtree)  |                                             |
| muscle atrophy (Emtree)                | "avelumab" [Supplementary Concept]      |                             | progression free survival (Emtree) |                                             |
| muscle strength (Emtree)               | "durvalumab" [Supplementary Concept]    |                             | prognosis (Emtree)                 |                                             |
| sarcopenia (Emtree)                    | cemiplimab [Supplementary Concept]      |                             | cancer prognosis (Emtree)          |                                             |
| muscle mass (Emtree)                   | "Ipilimumab"[Mesh]                      |                             | prospective study (Emtree)         |                                             |
| body composition (Emtree)              |                                         |                             | retrospective study (Emtree)       |                                             |
| muscle (Emtree)                        |                                         |                             | clinical trial (Emtree)            |                                             |
| muscle function (Emtree)               |                                         |                             | observational method (Emtree)      |                                             |
| skeletal muscle (MeSH)                 |                                         |                             | observational study (Emtree)       |                                             |
| sarcopenia (MeSH)                      |                                         |                             | clinical outcome (Emtree)          |                                             |
| muscle strength (MeSH)                 |                                         |                             | clinical outcome (Emtree)          |                                             |
| cachexia (MeSH)                        |                                         |                             | survival rate (MeSH)               |                                             |
| muscles (MeSH)                         |                                         |                             | survival (MeSH)                    |                                             |
|                                        |                                         |                             | progression-free survival (MeSH)   |                                             |
|                                        |                                         |                             | survival analysis (MeSH)           |                                             |
|                                        |                                         |                             | prognosis (MeSH)                   |                                             |
|                                        |                                         |                             | prospective studies (MeSH)         |                                             |
|                                        |                                         |                             | clinical trial (MeSH)              |                                             |

observational study (MeSH)  
retrospective studies  
(MeSH)  
humans (MeSH)

Supplementary Table S2. Search query and number of items found.

| Search | Query                                                                                                                                                                                                                                                                                                                                                                                                                                                                                                                                                                                                                                                                                                                                                                                                                                                                                                                                                                                                                                                                                                                                                                                                                                                                                                                                                                                                                                                                                                                                                                                                                                                                                                                                                                                                            | Items Found |
|--------|------------------------------------------------------------------------------------------------------------------------------------------------------------------------------------------------------------------------------------------------------------------------------------------------------------------------------------------------------------------------------------------------------------------------------------------------------------------------------------------------------------------------------------------------------------------------------------------------------------------------------------------------------------------------------------------------------------------------------------------------------------------------------------------------------------------------------------------------------------------------------------------------------------------------------------------------------------------------------------------------------------------------------------------------------------------------------------------------------------------------------------------------------------------------------------------------------------------------------------------------------------------------------------------------------------------------------------------------------------------------------------------------------------------------------------------------------------------------------------------------------------------------------------------------------------------------------------------------------------------------------------------------------------------------------------------------------------------------------------------------------------------------------------------------------------------|-------------|
|        | 1. PubMed                                                                                                                                                                                                                                                                                                                                                                                                                                                                                                                                                                                                                                                                                                                                                                                                                                                                                                                                                                                                                                                                                                                                                                                                                                                                                                                                                                                                                                                                                                                                                                                                                                                                                                                                                                                                        |             |
| #16    | (((((muscle* OR myosteatosis OR radiodensity OR skeletal muscle* radiation attenuation OR cachexia OR sarcopenia OR muscle* depletion OR muscle* loss OR muscle* wasting OR muscle* reduction OR muscle* strength OR muscle* mass OR reduced muscle* OR depleted muscle* OR skeletal muscle* OR muscle* attenuation OR loss of muscle* OR loss of skeletal muscle*) OR (skeletal muscle [MeSH] OR sarcopenia [MeSH] OR muscle strength [MeSH] OR cachexia [MeSH] OR muscles [MeSH])) AND ((immunotherap* OR PD1 OR PD-1 OR PD-L1 OR PDL1 OR PDCD1 OR CD274 OR programmed cell death OR programmed death ligand OR nivolumab OR pembrolizumab OR atezolizumab OR avelumab OR durvalumab OR cemiplimab OR immune checkpoint* OR checkpoint blockade*) OR ("Immunotherapy"[Mesh] OR "Nivolumab"[Mesh] OR "pembrolizumab" [Supplementary Concept] OR "atezolizumab" [Supplementary Concept] OR "avelumab" [Supplementary Concept] OR "durvalumab" [Supplementary Concept] OR cemiplimab [Supplementary Concept] OR "Ipilimumab"[Mesh])))) AND ((Cancer* OR tumor* OR malign* OR neoplasm* OR carcinoma) OR (neoplasms [MeSH])) AND ((human OR survival OR prognos* OR complicat* OR cox OR hazard ratio OR prospective OR clinical trial OR observational OR retrospective) OR (survival rate [MeSH] OR survival [MeSH] OR progression-free survival [MeSH] OR survival analysis [MeSH] OR prognosis [MeSH] OR prospective studies [MeSH] OR clinical trial [MeSH] OR "Observational Study" [Publication Type] OR retrospective studies [MeSH] OR humans [MeSH])) AND ((computed tomography OR CT OR MRI OR dual-energy X-ray absorption OR dual-energy X-ray absorptiometry OR DEXA OR DXA OR bioelectrical impedance analysis OR BIA) OR (spiral computed tomography [MeSH] OR magnetic resonance imaging [MeSH])) | 279         |
| #15    | (computed tomography OR CT OR MRI OR dual-energy X-ray absorption OR dual-energy X-ray absorptiometry OR DEXA OR DXA OR bioelectrical impedance analysis OR BIA) OR (spiral computed tomography [MeSH] OR magnetic resonance imaging [MeSH])                                                                                                                                                                                                                                                                                                                                                                                                                                                                                                                                                                                                                                                                                                                                                                                                                                                                                                                                                                                                                                                                                                                                                                                                                                                                                                                                                                                                                                                                                                                                                                     | 1,381,178   |
| #14    | spiral computed tomography [MeSH] OR magnetic resonance imaging [MeSH]                                                                                                                                                                                                                                                                                                                                                                                                                                                                                                                                                                                                                                                                                                                                                                                                                                                                                                                                                                                                                                                                                                                                                                                                                                                                                                                                                                                                                                                                                                                                                                                                                                                                                                                                           | 483,677     |
| #13    | computed tomography OR CT OR MRI OR dual-energy X-ray absorption OR dual-energy X-ray absorptiometry OR DEXA OR DXA OR bioelectrical impedance analysis OR BIA                                                                                                                                                                                                                                                                                                                                                                                                                                                                                                                                                                                                                                                                                                                                                                                                                                                                                                                                                                                                                                                                                                                                                                                                                                                                                                                                                                                                                                                                                                                                                                                                                                                   | 1,381,178   |
| #12    | (human OR survival OR prognos* OR complicat* OR cox OR hazard ratio OR prospective OR clinical trial OR observational OR retrospective) OR (survival rate [MeSH] OR survival [MeSH] OR progression-free survival [MeSH] OR survival analysis [MeSH] OR prognosis [MeSH] OR prospective studies [MeSH] OR clinical trial [MeSH] OR "Observational Study" [Publication Type] OR retrospective studies [MeSH] OR humans [MeSH])                                                                                                                                                                                                                                                                                                                                                                                                                                                                                                                                                                                                                                                                                                                                                                                                                                                                                                                                                                                                                                                                                                                                                                                                                                                                                                                                                                                     | 21,100,508  |
| #11    | survival rate [MeSH] OR survival [MeSH] OR progression-free survival [MeSH] OR survival analysis [MeSH] OR prognosis [MeSH] OR prospective studies [MeSH] OR clinical trial [MeSH] OR "Observational Study" [Publication Type] OR retrospective studies [MeSH] OR humans [MeSH]                                                                                                                                                                                                                                                                                                                                                                                                                                                                                                                                                                                                                                                                                                                                                                                                                                                                                                                                                                                                                                                                                                                                                                                                                                                                                                                                                                                                                                                                                                                                  | 19,214,642  |
| #10    | human OR survival OR prognos* OR complicat* OR cox OR hazard ratio OR prospective OR clinical trial OR observational OR retrospective                                                                                                                                                                                                                                                                                                                                                                                                                                                                                                                                                                                                                                                                                                                                                                                                                                                                                                                                                                                                                                                                                                                                                                                                                                                                                                                                                                                                                                                                                                                                                                                                                                                                            | 21,083,571  |
| #9     | (Cancer* OR tumor* OR malign* OR neoplasm* OR carcinoma) OR (neoplasms [MeSH])                                                                                                                                                                                                                                                                                                                                                                                                                                                                                                                                                                                                                                                                                                                                                                                                                                                                                                                                                                                                                                                                                                                                                                                                                                                                                                                                                                                                                                                                                                                                                                                                                                                                                                                                   | 4,904,022   |
| #8     | neoplasms [MeSH]                                                                                                                                                                                                                                                                                                                                                                                                                                                                                                                                                                                                                                                                                                                                                                                                                                                                                                                                                                                                                                                                                                                                                                                                                                                                                                                                                                                                                                                                                                                                                                                                                                                                                                                                                                                                 | 3,436,486   |
| #7     | Cancer* OR tumor* OR malign* OR neoplasm* OR carcinoma                                                                                                                                                                                                                                                                                                                                                                                                                                                                                                                                                                                                                                                                                                                                                                                                                                                                                                                                                                                                                                                                                                                                                                                                                                                                                                                                                                                                                                                                                                                                                                                                                                                                                                                                                           | 4,562,599   |
| #6     | (immunotherap* OR PD1 OR PD-1 OR PD-L1 OR PDL1 OR PDCD1 OR CD274 OR programmed cell death OR programmed death ligand OR nivolumab OR pembrolizumab OR atezolizumab OR avelumab OR durvalumab OR cemiplimab OR immune checkpoint* OR checkpoint blockade*) OR ("Immunotherapy"[Mesh] OR "Nivolumab"[Mesh] OR "pembrolizumab" [Supplementary Concept] OR "atezolizumab" [Supplementary Concept] OR "avelumab" [Supplementary Concept] OR "durvalumab" [Supplementary Concept] OR cemiplimab [Supplementary Concept] OR "Ipilimumab"[Mesh])                                                                                                                                                                                                                                                                                                                                                                                                                                                                                                                                                                                                                                                                                                                                                                                                                                                                                                                                                                                                                                                                                                                                                                                                                                                                         | 837,441     |
| #5     | "Immunotherapy"[Mesh] OR "Nivolumab"[Mesh] OR "pembrolizumab" [Supplementary Concept] OR "atezolizumab" [Supplementary Concept] OR "avelumab" [Supplementary Concept] OR "durvalumab" [Supplementary Concept] OR cemiplimab [Supplementary Concept] OR "Ipilimumab"[Mesh]                                                                                                                                                                                                                                                                                                                                                                                                                                                                                                                                                                                                                                                                                                                                                                                                                                                                                                                                                                                                                                                                                                                                                                                                                                                                                                                                                                                                                                                                                                                                        | 290,353     |
| #4     | immunotherap* OR PD1 OR PD-1 OR PD-L1 OR PDL1 OR PDCD1 OR CD274 OR programmed cell death OR programmed death ligand OR nivolumab OR pembrolizumab OR atezolizumab OR avelumab OR durvalumab OR cemiplimab OR immune checkpoint* OR checkpoint blockade*                                                                                                                                                                                                                                                                                                                                                                                                                                                                                                                                                                                                                                                                                                                                                                                                                                                                                                                                                                                                                                                                                                                                                                                                                                                                                                                                                                                                                                                                                                                                                          | 623,529     |
| #3     | (muscle* OR myosteatosis OR radiodensity OR skeletal muscle* radiation attenuation OR cachexia OR sarcopenia OR muscle* depletion OR muscle* loss OR muscle* wasting OR muscle* reduction OR muscle* strength OR muscle* mass OR reduced muscle* OR depleted muscle* OR skeletal muscle* OR muscle* attenuation OR loss of muscle* OR loss of skeletal muscle*) OR (skeletal muscle [MeSH] OR sarcopenia [MeSH] OR muscle strength [MeSH] OR cachexia [MeSH] OR muscles [MeSH])                                                                                                                                                                                                                                                                                                                                                                                                                                                                                                                                                                                                                                                                                                                                                                                                                                                                                                                                                                                                                                                                                                                                                                                                                                                                                                                                  | 1,196,987   |
| #2     | skeletal muscle [MeSH] OR sarcopenia [MeSH] OR muscle strength [MeSH] OR cachexia [MeSH] OR muscles [MeSH]                                                                                                                                                                                                                                                                                                                                                                                                                                                                                                                                                                                                                                                                                                                                                                                                                                                                                                                                                                                                                                                                                                                                                                                                                                                                                                                                                                                                                                                                                                                                                                                                                                                                                                       | 722,190     |



|                     |                                                                                                                                                                                                                                                                                                                                                                                                                                                                                                                              |            |
|---------------------|------------------------------------------------------------------------------------------------------------------------------------------------------------------------------------------------------------------------------------------------------------------------------------------------------------------------------------------------------------------------------------------------------------------------------------------------------------------------------------------------------------------------------|------------|
| #1                  | muscle* OR myosteatosis OR radiodensity OR skeletal muscle* radiation attenuation OR cachexia OR sarcopenia OR muscle* depletion OR muscle* loss OR muscle* wasting OR muscle* reduction OR muscle* strength OR muscle* mass OR reduced muscle* OR depleted muscle* OR skeletal muscle* OR muscle* attenuation OR loss of muscle* OR loss of skeletal muscle*                                                                                                                                                                | 1,006,778  |
| 2. Embase           |                                                                                                                                                                                                                                                                                                                                                                                                                                                                                                                              |            |
| #16                 | #3 AND #6 AND #9 AND #12 AND #15                                                                                                                                                                                                                                                                                                                                                                                                                                                                                             | 1,424      |
| #15                 | #13 OR #14                                                                                                                                                                                                                                                                                                                                                                                                                                                                                                                   | 2,443,915  |
| #14                 | computed tomography scanner'/exp OR 'computer assisted tomography'/exp OR 'dual energy x ray absorptiometry'/exp OR 'nuclear magnetic resonance imaging'/exp                                                                                                                                                                                                                                                                                                                                                                 | 1,939,830  |
| #13                 | computed tomography' OR 'ct' OR 'mri' OR 'dual-energy x-ray absorption' OR 'dual-energy x-ray absorptiometry' OR 'dexa' OR 'dxa' OR 'bioelectrical impedance analysis' OR 'bia'                                                                                                                                                                                                                                                                                                                                              | 1,590,600  |
| #12                 | #10 OR #11                                                                                                                                                                                                                                                                                                                                                                                                                                                                                                                   | 25,228,057 |
| #11                 | survival'/exp OR 'survival rate'/exp OR 'survival time'/exp OR 'event free survival'/exp OR 'overall survival'/exp OR 'disease free survival'/exp OR 'cancer survival'/exp OR 'median survival time'/exp OR 'survival prediction'/exp OR 'recurrence free survival'/exp OR 'progression free survival'/exp OR 'prognosis'/exp OR 'cancer prognosis'/exp OR 'prospective study'/exp OR 'retrospective study'/exp OR 'clinical trial'/exp OR 'observational method'/exp OR 'observational study'/exp OR 'clinical outcome'/exp | 4,518,116  |
| #10                 | human' OR 'survival' OR 'prognos*' OR 'complicat*' OR 'cox' OR 'hazard ratio' OR 'prospective' OR 'clinical trial' OR 'observational' OR 'retrospective'                                                                                                                                                                                                                                                                                                                                                                     | 25,213,281 |
| #9                  | #7 OR #8                                                                                                                                                                                                                                                                                                                                                                                                                                                                                                                     | 6,885,293  |
| #8                  | neoplasm'/exp                                                                                                                                                                                                                                                                                                                                                                                                                                                                                                                | 5,197,056  |
| #7                  | cancer*' OR 'tumor*' OR 'malign*' OR 'neoplasm*' OR 'carcinoma'                                                                                                                                                                                                                                                                                                                                                                                                                                                              | 6,356,934  |
| #6                  | #4 OR #5                                                                                                                                                                                                                                                                                                                                                                                                                                                                                                                     | 350,985    |
| #5                  | immunotherapy'/exp OR 'nivolumab'/exp OR 'pembrolizumab'/exp OR 'atezolizumab'/exp OR 'avelumab'/exp OR 'durvalumab'/exp OR 'cemiplimab'/exp OR 'immune checkpoint'/exp                                                                                                                                                                                                                                                                                                                                                      | 257,909    |
| #4                  | immunotherap*' OR 'pd1' OR 'pd-1' OR 'pd-l1' OR 'pdl1' OR 'pdc1' OR 'cd274' OR 'programmed cell death' OR 'programmed death ligand' OR 'nivolumab' OR 'pembrolizumab' OR 'atezolizumab' OR 'avelumab' OR 'durvalumab' OR 'cemiplimab' OR 'immune checkpoint*' OR 'checkpoint blockade*'                                                                                                                                                                                                                                      | 321,812    |
| #3                  | #1 OR #2                                                                                                                                                                                                                                                                                                                                                                                                                                                                                                                     | 2,090,357  |
| #2                  | cachexia'/exp OR 'malnutrition'/exp OR 'skeletal muscle'/exp OR 'muscle atrophy'/exp OR 'muscle strength'/exp OR 'sarcopenia'/exp OR 'muscle mass'/exp OR 'body composition'/exp OR 'muscle'/exp OR 'muscle function'/exp                                                                                                                                                                                                                                                                                                    | 1,287,127  |
| #1                  | muscle*' OR 'myosteatosis' OR 'radiodensity' OR 'skeletal muscle*' radiation attenuation OR 'cachexia' OR 'sarcopenia' OR 'muscle*' depletion OR 'muscle*' loss OR 'muscle*' wasting OR 'muscle*' reduction OR 'muscle*' strength OR 'muscle*' mass OR 'reduced muscle*' OR 'depleted muscle*' OR 'skeletal muscle*' OR 'muscle*' attenuation OR 'loss of muscle*' OR 'loss of skeletal muscle*'                                                                                                                             | 1,737,801  |
| 3. Cochrane Central |                                                                                                                                                                                                                                                                                                                                                                                                                                                                                                                              |            |
| #1                  | muscle* OR myosteatosis OR radiodensity OR skeletal muscle* radiation attenuation OR cachexia OR sarcopenia OR muscle* depletion OR muscle* loss OR muscle* wasting OR muscle* reduction OR muscle* strength OR muscle* mass OR reduced muscle* OR depleted muscle* OR skeletal muscle* OR muscle* attenuation OR loss of muscle* OR loss of skeletal muscle*                                                                                                                                                                |            |
| #2                  | MeSH descriptor: [Muscle, Skeletal] explode all trees                                                                                                                                                                                                                                                                                                                                                                                                                                                                        |            |
| #3                  | MeSH descriptor: [Sarcopenia] explode all trees                                                                                                                                                                                                                                                                                                                                                                                                                                                                              |            |
| #4                  | MeSH descriptor: [Muscle Strength] explode all trees                                                                                                                                                                                                                                                                                                                                                                                                                                                                         |            |
| #5                  | MeSH descriptor: [Cachexia] explode all trees                                                                                                                                                                                                                                                                                                                                                                                                                                                                                |            |
| #6                  | MeSH descriptor: [Muscles] explode all trees                                                                                                                                                                                                                                                                                                                                                                                                                                                                                 |            |
| #7                  | #1 OR #2 OR #3 OR #4 OR #5 OR #6                                                                                                                                                                                                                                                                                                                                                                                                                                                                                             |            |
| #8                  | immunotherap* OR PD1 OR PD-1 OR PD-L1 OR PDL1 OR PDCD1 OR CD274 OR programmed cell death OR programmed death ligand OR nivolumab OR pembrolizumab OR atezolizumab OR avelumab OR durvalumab OR cemiplimab OR immune checkpoint* OR checkpoint blockade*                                                                                                                                                                                                                                                                      |            |
| #9                  | MeSH descriptor: [Immunotherapy] explode all trees                                                                                                                                                                                                                                                                                                                                                                                                                                                                           |            |
| #10                 | MeSH descriptor: [Nivolumab] explode all trees                                                                                                                                                                                                                                                                                                                                                                                                                                                                               |            |
| #11                 | MeSH descriptor: [Ipilimumab] explode all trees                                                                                                                                                                                                                                                                                                                                                                                                                                                                              |            |
| #12                 | #8 OR #9 OR #10 OR #11                                                                                                                                                                                                                                                                                                                                                                                                                                                                                                       |            |
| #13                 | Cancer* OR tumor* OR malign* OR neoplasm* OR carcinoma                                                                                                                                                                                                                                                                                                                                                                                                                                                                       |            |
| #14                 | MeSH descriptor: [Neoplasms] explode all trees                                                                                                                                                                                                                                                                                                                                                                                                                                                                               |            |
| #15                 | #13 OR #14                                                                                                                                                                                                                                                                                                                                                                                                                                                                                                                   |            |
| #16                 | human OR survival OR prognos* OR complicat* OR cox OR hazard ratio OR prospective OR clinical trial OR observational OR retrospective                                                                                                                                                                                                                                                                                                                                                                                        |            |
| #17                 | MeSH descriptor: [Survival Rate] explode all trees                                                                                                                                                                                                                                                                                                                                                                                                                                                                           |            |
| #18                 | MeSH descriptor: [Survival] explode all trees                                                                                                                                                                                                                                                                                                                                                                                                                                                                                |            |
| #19                 | MeSH descriptor: [Progression-Free Survival] explode all trees                                                                                                                                                                                                                                                                                                                                                                                                                                                               |            |
| #20                 | MeSH descriptor: [Survival Analysis] explode all trees                                                                                                                                                                                                                                                                                                                                                                                                                                                                       |            |
| #21                 | MeSH descriptor: [Prognosis] explode all trees                                                                                                                                                                                                                                                                                                                                                                                                                                                                               |            |

|     |                                                                                                                                                                   |
|-----|-------------------------------------------------------------------------------------------------------------------------------------------------------------------|
| #22 | MeSH descriptor: [Prospective Studies] explode all trees                                                                                                          |
| #23 | MeSH descriptor: [Clinical Trial] explode all trees                                                                                                               |
| #24 | MeSH descriptor: [Observational Study] explode all trees                                                                                                          |
| #25 | MeSH descriptor: [Retrospective Studies] explode all trees                                                                                                        |
| #26 | MeSH descriptor: [Humanism] in all MeSH products                                                                                                                  |
| #27 | #16 OR #17 OR #18 OR #19 OR #20 OR #21 OR #22 OR #23 OR #24 OR #25 OR #26                                                                                         |
| #28 | computed tomography OR CT OR MRI OR dual-energy X-ray absorption OR dual-energy X-ray absorptiometry OR DEXA OR DXA<br>OR bioelectrical impedance analysis OR BIA |
| #29 | MeSH descriptor: [Tomography, Spiral Computed] explode all trees                                                                                                  |
| #30 | MeSH descriptor: [Magnetic Resonance Imaging] explode all trees                                                                                                   |
| #31 | #29 OR #30                                                                                                                                                        |
| #32 | #7 AND #12 AND #15 AND #27 AND #31                                                                                                                                |

**Supplementary Table S3.** Result types of the studies included in the meta-analysis.

| Author / Year                    | OS                  |              | PFS                 |              |
|----------------------------------|---------------------|--------------|---------------------|--------------|
|                                  | Univariate Analysis | Adjusted HRs | Univariate Analysis | Adjusted HRs |
| Cortellini 2020 [12]             | ✓                   | ✓            | ✓                   | ✓            |
| Shimizu 2020 [13]                | ✓                   | ✓            | ✓                   | ✓            |
| Minami 2020 [14]                 |                     | ✓            |                     | ✓            |
| Magri 2019 [19]                  | ✓                   | ✓            |                     |              |
| Roch 2020 [32]                   |                     |              |                     | ✓            |
| Shiroyama 2019 [33]              |                     |              | ✓                   | ✓            |
| Takada 2020 [34]                 | ✓                   | ✓            | ✓                   | ✓            |
| Tsukagoshi 2020 [35]             | ✓                   |              | ✓                   | ✓            |
| Chu 2020 [36]                    |                     | ✓            |                     | ✓            |
| Kim N 2020 [37]                  | ✓                   | ✓            | ✓                   |              |
| Akce 2020 [38]                   |                     | ✓            |                     | ✓            |
| Young 2020 [39]                  | ✓                   |              | ✓                   |              |
| Fukushima 2020 [40]              |                     |              | ✓                   |              |
| Kim Y 2020 [41]                  | ✓                   | ✓            | ✓                   | ✓            |
| Total number of included studies | 8                   | 9            | 9                   | 10           |

**Supplementary Table S4.** Covariates of the studies using adjusted HRs.

| Author, year         | Country | Cancer                       | Covariates                                                                                                                         |
|----------------------|---------|------------------------------|------------------------------------------------------------------------------------------------------------------------------------|
| Cortellini 2020 [12] | Italy   | NSCLC, Melanoma, RCC, others | Primary tumor, Number of metastatic sites, treatment line                                                                          |
| Shimizu 2020 [13]    | Japan   | Urothelial carcinoma         | neutrophil–lymphocyte ratio prognostic nutritional index ECOG, Liver metastasis                                                    |
| Minami 2020 [14]     | Japan   | NSCLC                        | serum albumin, neutrophil-to-lymphocyte ratio, performance status and driver mutations                                             |
| Magri 2019 [19]      | Italy   | NSCLC                        | Sex, age, PS, Histology, smoking history, previous chemotherapy regimens, albumin, BMI, SMI, FFMI, FMI, weight change              |
| Roch 2020 [32]       | France  | NSCLC                        | body mass index (BMI), the PD-L1 IHC score, the serum albumin level and the somatic genotype                                       |
| Shiroyama 2019 [33]  | Japan   | NSCLC                        | Sex, ECOG PS                                                                                                                       |
| Takada 2020 [34]     | Japan   | NSCLC                        | Age, ECOG, Smoking history, Mutation status                                                                                        |
| Tsukagoshi 2020 [35] | Japan   | NSCLC                        | Smoking history                                                                                                                    |
| Chu 2020 [36]        | Canada  | Melanoma                     | Age, male sex, LDH, positive BRAF status, ICI dosage                                                                               |
| Kim N 2020 [37]      | Korea   | HCC                          | ECOG PS, ALBI group, AFP, Intrahepatic tumor burden, Surgery, RT, ALC & NLR risk group                                             |
| Akce 2020 [38]       | USA     | HCC                          | Baseline CPS, Inflammation biomarkers: NLR for OS and PLR for PFS                                                                  |
| Young 2020 [39]      | USA     | Melanoma                     | NA                                                                                                                                 |
| Fukushima 2020 [40]  | Japan   | Urothelial carcinoma         | NA                                                                                                                                 |
| Kim Y 2020 [41]      | Korea   | Gastric cancer               | previous chemotherapy regimens, Number of metastatic sites, ECOG PS, albumin, PD/SRC type [WD/MD], EBV negativity, HER2 negativity |

NA: Not available
